# Supplementary material for: Monitoring an Alien Invasion: DNA Barcoding and the Identification of Lionfish and Their Prey on Coral Reefs of the Mexican Caribbean
Source: PLoS One. 2012 Jun 1;7(6):e36636. doi: 10.1371/journal.pone.0036636 (PMC3365883; doi:10.1371/journal.pone.0036636)
Supplement: Table S1 — accession codes from specimens of the public database in BOLD and GenBank (XLS). (XLS) [file pone.0036636.s001.xls]

## Sheet: Hoja1
Identification	Sample ID	Museum ID	Processid	Institution Storing	GenBank
Pterois volitans	MXIV186	ECOCH	MXIV186-10	El Colegio de la Frontera Sur, Chetumal	HM379920
Pterois volitans	MXIV185	ECOCH6369	MXIV185-10	El Colegio de la Frontera Sur, Chetumal	HM379919
Pterois volitans	MXIV184	ECOCH6369	MXIV184-10	El Colegio de la Frontera Sur, Chetumal	HM379918
Pterois volitans	MXIV182	ECOCH6369	MXIV182-10	El Colegio de la Frontera Sur, Chetumal	HQ966006
Pterois volitans	MXIV176	ECOCH6369	MXIV176-10	El Colegio de la Frontera Sur, Chetumal	HM379915
Pterois volitans	MXIV175	ECOCH6369	MXIV175-10	El Colegio de la Frontera Sur, Chetumal	HM379914
Pterois volitans	MXIV171	ECOCH6369	MXIV171-10	El Colegio de la Frontera Sur, Chetumal	HM379911
Pterois volitans	MXIV170	ECOCH6369	MXIV170-10	El Colegio de la Frontera Sur, Chetumal	HM379910
Pterois volitans	MXIV169	ECOCH6369	MXIV169-10	El Colegio de la Frontera Sur, Chetumal	HM379909
Pterois volitans	MXIV168	ECOCH6372	MXIV168-10	El Colegio de la Frontera Sur, Chetumal	HM379908
Pterois volitans	MXIV167	ECOCH6372	MXIV167-10	El Colegio de la Frontera Sur, Chetumal	HM379907
Pterois volitans	MXIV166	ECOCH6371	MXIV166-10	El Colegio de la Frontera Sur, Chetumal	HM379906
Pterois volitans	MXIV153	ECOCH6369	MXIV153-10	El Colegio de la Frontera Sur, Chetumal	HM379897
Pterois volitans	MXIV152	ECOCH6370	MXIV152-10	El Colegio de la Frontera Sur, Chetumal	HM379896
Pterois volitans	MXIV148	ECOCH6369	MXIV148-10	El Colegio de la Frontera Sur, Chetumal	HM379894
Pterois volitans	MXIV147	ECOCH6369	MXIV147-10	El Colegio de la Frontera Sur, Chetumal	HM379893
Pterois volitans	MXIV146	ECOCH6369	MXIV146-10	El Colegio de la Frontera Sur, Chetumal	HM379892
Pterois volitans	MXIV145	ECOCH6369	MXIV145-10	El Colegio de la Frontera Sur, Chetumal	HM379891
Pterois volitans	MXIV144	ECOCH6369	MXIV144-10	El Colegio de la Frontera Sur, Chetumal	HM379890
Pterois volitans	MXIV143	ECOCH6369	MXIV143-10	El Colegio de la Frontera Sur, Chetumal	HM379889
Pterois volitans	MXIV141	ECOCH6369	MXIV141-10	El Colegio de la Frontera Sur, Chetumal	HM379888
Pterois volitans	MXIV140	ECOCH6369	MXIV140-10	El Colegio de la Frontera Sur, Chetumal	HM379887
Pterois volitans	MXIV139	ECOCH6369	MXIV139-10	El Colegio de la Frontera Sur, Chetumal	HM379886
Pterois volitans	MXIV138	ECOCH6369	MXIV138-10	El Colegio de la Frontera Sur, Chetumal	HM379885
Pterois volitans	MXIV137	ECOCH6369	MXIV137-10	El Colegio de la Frontera Sur, Chetumal	HM379884
Pterois volitans	MXIV0202	ECOCH6416	MXIV202-10	El Colegio de la Frontera Sur, Chetumal	HQ966011
Pterois volitans	MXIV0201	ECOCH6416	MXIV201-10	El Colegio de la Frontera Sur, Chetumal	HQ966010
Pterois volitans	MXIV0200	ECOCH6416	MXIV200-10	El Colegio de la Frontera Sur, Chetumal	HQ966009
Pterois volitans	MXIV0199	ECOCH6416	MXIV199-10	El Colegio de la Frontera Sur, Chetumal
Pterois volitans	MXIV0198	ECOCH6416	MXIV198-10	El Colegio de la Frontera Sur, Chetumal	HQ966008
Abudefduf saxatilis	MXIV0263	ECOCH6416	MXIV263-10	El Colegio de la Frontera Sur, Chetumal	HQ966044
Apogon lachneri	MXIV0880	ECOCH7009	MXIV502-10	El Colegio de la Frontera Sur, Chetumal	JN311701
Apogon lachneri	MXIV174	ECOCH	MXIV174-10	El Colegio de la Frontera Sur, Chetumal	HM379913
Apogon maculatus	MXIV0260	ECOCH6416	MXIV260-10	El Colegio de la Frontera Sur, Chetumal	HQ966043
Apogon maculatus	MXIV0259	ECOCH6416	MXIV259-10	El Colegio de la Frontera Sur, Chetumal	HQ966042
Apogon mosavi	MXIV159	ECOCH	MXIV159-10	El Colegio de la Frontera Sur, Chetumal	HM379902
Apogon townsendi	MXIV0232	ECOCH6416	MXIV232-10	El Colegio de la Frontera Sur, Chetumal	HQ966025
Apogon townsendi	MXIV173	ECOCH	MXIV173-10	El Colegio de la Frontera Sur, Chetumal	HM379912
Astrapogon	MXIV0926	ECOCH7009	MXIV548-10	El Colegio de la Frontera Sur, Chetumal
Astrapogon puncticulatus	MXIV0886	ECOCH7009	MXIV508-10	El Colegio de la Frontera Sur, Chetumal	JN311702
Bothus lunatus	MXIV0850	ECOCH7009	MXIV472-10	El Colegio de la Frontera Sur, Chetumal
Cephalopholis cruentata	MXIV0878	ECOCH7009	MXIV500-10	El Colegio de la Frontera Sur, Chetumal	JN313791
Cephalopholis cruentata	MXIV0264	ECOCH6416	MXIV264-10	El Colegio de la Frontera Sur, Chetumal
Cephalopholis cruentata	MXIV0866	ECOCH7009	MXIV488-10	El Colegio de la Frontera Sur, Chetumal
Coryphopterus eidolon	MXIV0265	ECOCH6416	MXIV265-10	El Colegio de la Frontera Sur, Chetumal	HQ966045
Coryphopterus eidolon	MXIV0252	ECOCH6416	MXIV252-10	El Colegio de la Frontera Sur, Chetumal	HQ966037
Coryphopterus hyalinus	MXIV0266	ECOCH6416	MXIV266-10	El Colegio de la Frontera Sur, Chetumal
Coryphopterus hyalinus	MXIV0191	ECOCH6416	MXIV191-10	El Colegio de la Frontera Sur, Chetumal
Coryphopterus thrix	MXIV181	ECOCH	MXIV181-10	El Colegio de la Frontera Sur, Chetumal	HM379917
Coryphopterus thrix	MXIV163	ECOCH	MXIV163-10	El Colegio de la Frontera Sur, Chetumal	HM379904
Coryphopterus tortugae	MXIV0939	ECOCH7009	MXIV561-10	El Colegio de la Frontera Sur, Chetumal	JN311883
Coryphopterus tortugae	MXIV0932	ECOCH7009	MXIV554-10	El Colegio de la Frontera Sur, Chetumal	JN311882
Coryphopterus tortugae	MXIV0908	ECOCH7009	MXIV530-10	El Colegio de la Frontera Sur, Chetumal	JN311880
Coryphopterus tortugae	MXIV0215	ECOCH6416	MXIV215-10	El Colegio de la Frontera Sur, Chetumal
Coryphopterus tortugae	MXIV0448	ECOCH7009	MFIV354-10	El Colegio de la Frontera Sur, Chetumal	JN311877
Coryphopterus tortugae	MXIV0914	ECOCH7009	MXIV536-10	El Colegio de la Frontera Sur, Chetumal	JN311881
Coryphopterus venezuelae	MXIV0256	ECOCH6416	MXIV256-10	El Colegio de la Frontera Sur, Chetumal	HQ966041
Coryphopterus venezuelae	MXIV0253	ECOCH6416	MXIV253-10	El Colegio de la Frontera Sur, Chetumal	HQ966038
Coryphopterus venezuelae	MXIV0881	ECOCH7009	MXIV503-10	El Colegio de la Frontera Sur, Chetumal
Coryphopterus venezuelae	MXIV155	ECOCH	MXIV155-10	El Colegio de la Frontera Sur, Chetumal	HM379899
Coryphopterus venezuelae	MXIV156	ECOCH	MXIV156-10	El Colegio de la Frontera Sur, Chetumal	HM379900
Coryphopterus venezuelae	MXIV157	ECOCH	MXIV157-10	El Colegio de la Frontera Sur, Chetumal	HM379901
Decapoda	CRU0110	ECOCH6416	CRM108-10	El Colegio de la Frontera Sur, Chetumal
Decapoda	CRU0115	ECOCH6416	CRM113-10	El Colegio de la Frontera Sur, Chetumal
Decapoda	CRU0197	ECOCH7009	CRM219-10	El Colegio de la Frontera Sur, Chetumal
Decapoda	CRU0196	ECOCH7009	CRM218-10	El Colegio de la Frontera Sur, Chetumal
Decapoda	CRU0216	ECOCH7009	CRM238-10	El Colegio de la Frontera Sur, Chetumal
Decapoda	CRU0234	ECOCH7009	CRM256-10	El Colegio de la Frontera Sur, Chetumal
Decapoda	CRU0193	ECOCH7009	CRM215-10	El Colegio de la Frontera Sur, Chetumal
Decapoda	CRU0191	ECOCH7009	CRM213-10	El Colegio de la Frontera Sur, Chetumal
Decapoda	CRU0232	ECOCH7009	CRM254-10	El Colegio de la Frontera Sur, Chetumal
Decapoda	CRU0156	ECOCH6416	CRM154-10	El Colegio de la Frontera Sur, Chetumal
Decapoda	CRU0220	ECOCH7009	CRM242-10	El Colegio de la Frontera Sur, Chetumal
Decapoda	CRU0221	ECOCH7009	CRM243-10	El Colegio de la Frontera Sur, Chetumal
Decapoda	CRU0104	ECOCH6416	CRM102-10	El Colegio de la Frontera Sur, Chetumal
Decapoda	CRU0130	ECOCH6416	CRM128-10	El Colegio de la Frontera Sur, Chetumal
Decapoda	CRU0134	ECOCH6416	CRM132-10	El Colegio de la Frontera Sur, Chetumal
Decapoda	CRU0227	ECOCH7009	CRM249-10	El Colegio de la Frontera Sur, Chetumal
Decapoda	CRU0149	ECOCH6416	CRM147-10	El Colegio de la Frontera Sur, Chetumal
Decapoda	CRU0229	ECOCH7009	CRM251-10	El Colegio de la Frontera Sur, Chetumal
Decapoda	CRU0235	ECOCH7009	CRM257-10	El Colegio de la Frontera Sur, Chetumal
Decapoda	CRU0200	ECOCH7009	CRM222-10	El Colegio de la Frontera Sur, Chetumal
Decapoda	CRU0201	ECOCH7009	CRM223-10	El Colegio de la Frontera Sur, Chetumal
Decapoda	CRU0128.1	ECOCH6416	CRM296-11	El Colegio de la Frontera Sur, Chetumal
Decapoda	CRU0132.1	ECOCH6416	CRM298-11	El Colegio de la Frontera Sur, Chetumal
Decapoda	CRU0152.1	ECOCH6416	CRM289-11	El Colegio de la Frontera Sur, Chetumal
Decapoda	CRU0237	ECOCH7009	CRM259-10	El Colegio de la Frontera Sur, Chetumal
Decapoda	CRU0217	ECOCH7009	CRM239-10	El Colegio de la Frontera Sur, Chetumal
Decapoda	CRU0106	ECOCH6416	CRM104-10	El Colegio de la Frontera Sur, Chetumal
Decapoda	CRU0113	ECOCH6416	CRM111-10	El Colegio de la Frontera Sur, Chetumal
Enneanectes altivelis	MXIV0217	ECOCH6416	MXIV217-10	El Colegio de la Frontera Sur, Chetumal	HQ966017
Enneanectes altivelis	MXIV0216	ECOCH6416	MXIV216-10	El Colegio de la Frontera Sur, Chetumal	HQ966016
Enneanectes altivelis	MXIV160	ECOCH	MXIV160-10	El Colegio de la Frontera Sur, Chetumal	HM379903
Enneanectes boehlkei	MXIV0237	ECOCH6416	MXIV237-10	El Colegio de la Frontera Sur, Chetumal
Euphausia americana	CRU0124.1	ECOCH6416	CRM294-11	El Colegio de la Frontera Sur, Chetumal
Gonodactylidae	CRU0238	ECOCH7009	CRM260-10	El Colegio de la Frontera Sur, Chetumal
Gramma loreto	MXIV0883	ECOCH7009	MXIV505-10	El Colegio de la Frontera Sur, Chetumal
Gramma loreto	MXIV0862	ECOCH7009	MXIV484-10	El Colegio de la Frontera Sur, Chetumal
Gramma loreto	MXIV0869	ECOCH7009	MXIV491-10	El Colegio de la Frontera Sur, Chetumal
Haemulon flavolineatum	MXIV0270	ECOCH6416	MXIV270-10	El Colegio de la Frontera Sur, Chetumal	HQ966046
Haemulon flavolineatum	MXIV0245	ECOCH6416	MXIV245-10	El Colegio de la Frontera Sur, Chetumal
Haemulon flavolineatum	MXIV0271	ECOCH6416	MXIV271-10	El Colegio de la Frontera Sur, Chetumal	HQ966047
Halichoeres garnoti	MXIV0455	ECOCH7009	MFIV361-10	El Colegio de la Frontera Sur, Chetumal	JN313635
Halichoeres garnoti	MXIV0896	ECOCH7009	MXIV518-10	El Colegio de la Frontera Sur, Chetumal
Halichoeres garnoti	MXIV0895	ECOCH7009	MXIV517-10	El Colegio de la Frontera Sur, Chetumal
Halichoeres garnoti	MXIV0451	ECOCH7009	MFIV357-10	El Colegio de la Frontera Sur, Chetumal	JN313634
Halichoeres garnoti	MXIV0900	ECOCH7009	MXIV522-10	El Colegio de la Frontera Sur, Chetumal
Halichoeres garnoti	MXIV854.1	ECOCH7009	MXIV583-11	El Colegio de la Frontera Sur, Chetumal
Halichoeres garnoti	MXIV0236	ECOCH6416	MXIV236-10	El Colegio de la Frontera Sur, Chetumal	HQ966029
Halichoeres garnoti	MXIV154	ECOCH	MXIV154-10	El Colegio de la Frontera Sur, Chetumal	HM379898
Halichoeres garnoti	MXIV0471	ECOCH7009	MFIV377-10	El Colegio de la Frontera Sur, Chetumal	JN313638
Halichoeres garnoti	MXIV0193	ECOCH6416	MXIV193-10	El Colegio de la Frontera Sur, Chetumal	HQ966007
Halichoeres garnoti	MXIV0907	ECOCH7009	MXIV529-10	El Colegio de la Frontera Sur, Chetumal
Halichoeres garnoti	MXIV0898	ECOCH7009	MXIV520-10	El Colegio de la Frontera Sur, Chetumal
Halichoeres garnoti	MXIV0905	ECOCH7009	MXIV527-10	El Colegio de la Frontera Sur, Chetumal
Halichoeres garnoti	MXIV0213	ECOCH6416	MXIV213-10	El Colegio de la Frontera Sur, Chetumal	HQ966014
Halichoeres garnoti	MXIV0904	ECOCH7009	MXIV526-10	El Colegio de la Frontera Sur, Chetumal
Halichoeres garnoti	MXIV0891	ECOCH7009	MXIV513-10	El Colegio de la Frontera Sur, Chetumal
Halichoeres garnoti	MXIV0903	ECOCH7009	MXIV525-10	El Colegio de la Frontera Sur, Chetumal
Halichoeres garnoti	MXIV0902	ECOCH7009	MXIV524-10	El Colegio de la Frontera Sur, Chetumal
Halichoeres garnoti	MXIV0873	ECOCH7009	MXIV495-10	El Colegio de la Frontera Sur, Chetumal
Halichoeres garnoti	MXIV0233	ECOCH6416	MXIV233-10	El Colegio de la Frontera Sur, Chetumal	HQ966026
Halichoeres garnoti	MXIV0917	ECOCH7009	MXIV539-10	El Colegio de la Frontera Sur, Chetumal
Halichoeres garnoti	MXIV0445	ECOCH7009	MFIV351-10	El Colegio de la Frontera Sur, Chetumal	JN313633
Liopropoma rubre	MXIV861.1	ECOCH7009	MXIV576-11	El Colegio de la Frontera Sur, Chetumal
Liopropoma rubre	MXIV853.1	ECOCH7009	MXIV578-11	El Colegio de la Frontera Sur, Chetumal
Lythrypnus	MXIV0223	ECOCH6416	MXIV223-10	El Colegio de la Frontera Sur, Chetumal	HQ966020
Lythrypnus	MXIV164	ECOCH	MXIV164-10	El Colegio de la Frontera Sur, Chetumal	HM379905
Lythrypnus	MXIV0224	ECOCH6416	MXIV224-10	El Colegio de la Frontera Sur, Chetumal	HQ966021
Lythrypnus	MXIV0214	ECOCH6416	MXIV214-10	El Colegio de la Frontera Sur, Chetumal	HQ966015
Lythrypnus	MXIV0222	ECOCH6416	MXIV222-10	El Colegio de la Frontera Sur, Chetumal	HQ966019
Lythrypnus	MXIV0221	ECOCH6416	MXIV221-10	El Colegio de la Frontera Sur, Chetumal	HQ966018
Malacoctenus triangulatus	MXIV0240	ECOCH6416	MXIV240-10	El Colegio de la Frontera Sur, Chetumal	HQ966032
Malacoctenus triangulatus	MXIV0916	ECOCH7009	MXIV538-10	El Colegio de la Frontera Sur, Chetumal
Monacanthus tuckeri	MXIV150	ECOCH	MXIV150-10	El Colegio de la Frontera Sur, Chetumal	HM379895
Palaemonidae	CRU0107	ECOCH6416	CRM105-10	El Colegio de la Frontera Sur, Chetumal
Palaemonidae	CRU0213	ECOCH7009	CRM235-10	El Colegio de la Frontera Sur, Chetumal
Palaemonidae	CRU0202	ECOCH7009	CRM224-10	El Colegio de la Frontera Sur, Chetumal
Palaemonidae	CRU0153.1	ECOCH6416	CRM290-11	El Colegio de la Frontera Sur, Chetumal
Palaemonidae	CRU0155	ECOCH6416	CRM153-10	El Colegio de la Frontera Sur, Chetumal
Palaemonidae	CRU0141.1	ECOCH6416	CRM285-11	El Colegio de la Frontera Sur, Chetumal
Palaemonidae	CRU0140	ECOCH6416	CRM138-10	El Colegio de la Frontera Sur, Chetumal
Palaemonidae	CRU0138	ECOCH6416	CRM136-10	El Colegio de la Frontera Sur, Chetumal
Palaemonidae	CRU0136	ECOCH6416	CRM134-10	El Colegio de la Frontera Sur, Chetumal
Palaemonidae	CRU0101	ECOCH6416	CRM099-10	El Colegio de la Frontera Sur, Chetumal
Priolepis hipoliti	MXIV161	ECOCH	MXIV161-10	El Colegio de la Frontera Sur, Chetumal	HQ966005
Pseudosquilla	CRU0198	ECOCH7009	CRM220-10	El Colegio de la Frontera Sur, Chetumal
Pterois volitans	MXIV0244	ECOCH6416	MXIV244-10	El Colegio de la Frontera Sur, Chetumal	HQ966035
Pterois volitans	MXIV0242	ECOCH6416	MXIV242-10	El Colegio de la Frontera Sur, Chetumal	HQ966033
Pterois volitans	MXIV0243	ECOCH6416	MXIV243-10	El Colegio de la Frontera Sur, Chetumal	HQ966034
Pterois volitans	MXIV0879	ECOCH7009	MXIV501-10	El Colegio de la Frontera Sur, Chetumal
Pterois volitans	MXIV0209	ECOCH6416	MXIV209-10	El Colegio de la Frontera Sur, Chetumal	HQ966013
Pterois volitans	MXIV0876	ECOCH7009	MXIV498-10	El Colegio de la Frontera Sur, Chetumal
Pterois volitans	MXIV0226	ECOCH6416	MXIV226-10	El Colegio de la Frontera Sur, Chetumal	HQ966022
Pterois volitans	MXIV0467	ECOCH7009	MFIV373-10	El Colegio de la Frontera Sur, Chetumal
Pterois volitans	MXIV0230	ECOCH6416	MXIV230-10	El Colegio de la Frontera Sur, Chetumal	HQ966023
Pterois volitans	MXIV0254	ECOCH6416	MXIV254-10	El Colegio de la Frontera Sur, Chetumal	HQ966039
Pterois volitans	MXIV0238	ECOCH6416	MXIV238-10	El Colegio de la Frontera Sur, Chetumal	HQ966030
Pterois volitans	MXIV0865	ECOCH7009	MXIV487-10	El Colegio de la Frontera Sur, Chetumal
Pterois volitans	MXIV0255	ECOCH6416	MXIV255-10	El Colegio de la Frontera Sur, Chetumal	HQ966040
Pterois volitans	MXIV870.1	ECOCH7009	MXIV569-11	El Colegio de la Frontera Sur, Chetumal
Pterois volitans	MXIV0250	ECOCH6416	MXIV250-10	El Colegio de la Frontera Sur, Chetumal	HQ966036
Pterois volitans	MXIV0868	ECOCH7009	MXIV490-10	El Colegio de la Frontera Sur, Chetumal
Sargocentron coruscum	MXIV0921	ECOCH7009	MXIV543-10	El Colegio de la Frontera Sur, Chetumal
Scarus iseri	MXIV0887	ECOCH7009	MXIV509-10	El Colegio de la Frontera Sur, Chetumal
Scarus iseri	MXIV0890	ECOCH7009	MXIV512-10	El Colegio de la Frontera Sur, Chetumal	JN312305
Scarus taeniopterus	MXIV0858	ECOCH7009	MXIV480-10	El Colegio de la Frontera Sur, Chetumal
Sparisoma aurofrenatum	MXIV0457	ECOCH7009	MFIV363-10	El Colegio de la Frontera Sur, Chetumal	JN312362
Sparisoma aurofrenatum	MXIV0456	ECOCH7009	MFIV362-10	El Colegio de la Frontera Sur, Chetumal	JN312361
Sparisoma aurofrenatum	MXIV0450	ECOCH7009	MFIV356-10	El Colegio de la Frontera Sur, Chetumal	JN312360
Sparisoma aurofrenatum	MXIV0447	ECOCH7009	MFIV353-10	El Colegio de la Frontera Sur, Chetumal	JN312358
Sparisoma aurofrenatum	MXIV0444	ECOCH7009	MFIV350-10	El Colegio de la Frontera Sur, Chetumal	JN312357
Sparisoma aurofrenatum	MXIV0867	ECOCH7009	MXIV489-10	El Colegio de la Frontera Sur, Chetumal
Sparisoma aurofrenatum	MXIV0877	ECOCH7009	MXIV499-10	El Colegio de la Frontera Sur, Chetumal
Sparisoma aurofrenatum	MXIV0889	ECOCH7009	MXIV511-10	El Colegio de la Frontera Sur, Chetumal	JN312363
Sparisoma viride	MXIV0443	ECOCH7009	MFIV349-10	El Colegio de la Frontera Sur, Chetumal	JN312356
Sparisoma viride	MXIV178	ECOCH	MXIV178-10	El Colegio de la Frontera Sur, Chetumal	HM379916
Sparisoma viride	MXIV0449	ECOCH7009	MFIV355-10	El Colegio de la Frontera Sur, Chetumal	JN312359
Starksia	MXIV0231	ECOCH6416	MXIV231-10	El Colegio de la Frontera Sur, Chetumal	HQ966024
Starksia ocellata	MXIV0925	ECOCH7009	MXIV547-10	El Colegio de la Frontera Sur, Chetumal
Stegastes partitus	MXIV871.1	ECOCH7009	MXIV568-11	El Colegio de la Frontera Sur, Chetumal
Stegastes partitus	MXIV0235	ECOCH6416	MXIV235-10	El Colegio de la Frontera Sur, Chetumal	HQ966028
Stegastes partitus	MXIV0882	ECOCH7009	MXIV504-10	El Colegio de la Frontera Sur, Chetumal
Stegastes partitus	MXIV0874	ECOCH7009	MXIV496-10	El Colegio de la Frontera Sur, Chetumal
Stegastes partitus	MXIV0851	ECOCH7009	MXIV473-10	El Colegio de la Frontera Sur, Chetumal
Stegastes partitus	MXIV0872	ECOCH7009	MXIV494-10	El Colegio de la Frontera Sur, Chetumal
Synalpheus	CRU0120	ECOCH6416	CRM118-10	El Colegio de la Frontera Sur, Chetumal
Thalassoma bifasciatum	MXIV857.1	ECOCH7009	MXIV582-11	El Colegio de la Frontera Sur, Chetumal
Thalassoma bifasciatum	MXIV0909	ECOCH7009	MXIV531-10	El Colegio de la Frontera Sur, Chetumal
Thalassoma bifasciatum	MXIV0234	ECOCH6416	MXIV234-10	El Colegio de la Frontera Sur, Chetumal	HQ966027
Thalassoma bifasciatum	MXIV0859	ECOCH7009	MXIV481-10	El Colegio de la Frontera Sur, Chetumal
Thalassoma bifasciatum	MXIV860.1	ECOCH7009	MXIV566-11	El Colegio de la Frontera Sur, Chetumal
Thalassoma bifasciatum	MXIV0207	ECOCH6416	MXIV207-10	El Colegio de la Frontera Sur, Chetumal	HQ966012
Thalassoma bifasciatum	MXIV855.1	ECOCH7009	MXIV577-11	El Colegio de la Frontera Sur, Chetumal
Thalassoma bifasciatum	MXIV0915	ECOCH7009	MXIV537-10	El Colegio de la Frontera Sur, Chetumal
Thalassoma bifasciatum	MXIV0929	ECOCH7009	MXIV551-10	El Colegio de la Frontera Sur, Chetumal
Thalassoma bifasciatum	MXIV0239	ECOCH6416	MXIV239-10	El Colegio de la Frontera Sur, Chetumal	HQ966031
Thor	CRU0118	ECOCH6416	CRM116-10	El Colegio de la Frontera Sur, Chetumal
